# Supplementary material
Source: PubMed Central journal article supplement (PMC5773378)
Supplement: NIHMS927406-supplement.pdf [file NIHMS927406-supplement.pdf]

**Table S1 (Related to Figure 1). Overview of buried residues and hydrogen bonds at interaction interfaces**

Buried residues in the IL-23:IL-23R:Nb22E11 structure listed per interface determined by PISA  
<http://www.ebi.ac.uk/pdbe/pisa/>

| IL-23R:IL-23p19 |          | IL-23R:IL-12p40 |          | IL-12p40: IL-23p19 |          | IL-12p40:Nb22E11 |         |
|-----------------|----------|-----------------|----------|--------------------|----------|------------------|---------|
| IL-23R          | IL-23p19 | IL23R           | IL-12p40 | IL-12p40           | IL-23p19 | IL-12p40         | Nb22E11 |
| Gly24           | Asp55    | Arg62           | Lys107   | Lys124             | Q34      | Leu35            | Arg27   |
| Ile25           | Leu56    | Pro106          | Asp109   | Tyr136             | Q38      | W37              | Thr28   |
| Thr26           | Arg57    | Lys107          | Gly110   | Ala198             | Cys41    | Pro39            | Phe29   |
| N27             | Glu58    | His108          | Ile111   | Cys199             | W45      | Asp40            | Ser30   |
| Ile28           | Glu59    | Phe109          | W112     | Ala201             | Asp55    | Leu62            | W31     |
| N29             | Gly60    | Q110            | Thr114   | Ala202             | Pro69    | Asp63            | Glu44   |
| Cys30           | Asp67    |                 | Lys124   | Glu203             | His70    | Glu67            | Arg52   |
| Ser31           | Val68    |                 | Lys126   | Glu204             | Ile71    | Lys80            | Gly56   |
| Ile56           | His70    |                 | Phe128   | Ser205             | Q72      | Glu81            | Ser57   |
| Lys57           | Phe99    |                 | Tyr223   | Phe228             | Cys73    | Phe82            | Pro58   |
| Tyr67           | Tyr100   |                 | Thr224   | Arg230             | Gly74    | Gly83            | Tyr59   |
| N69             | Leu103   |                 |          | Pro265             | Cys77    | Ala85            | Lys65   |
| Gly70           | Ile108   |                 |          | Ser267             | Asp78    | Lys106           | Ser100  |
| Ser98           | Pro113   |                 |          | Tyr268             | Pro79    | Glu108           | Leu101  |
| Met99           | Q154     |                 |          | Phe269             | Leu82    | Asp115           | Phe102  |
| Tyr100          | Pro155   |                 |          | Ser270             | Tyr100   | Ile116           | Pro103  |
| Thr102          | W156     |                 |          | Asp292             | Arg167   | Lys118           | Thr104  |
| His108          | Q157     |                 |          | Asp312             | Ser168   | Thr147           | Ser105  |
| Phe109          | Leu159   |                 |          | Arg313             | Q170     | Ile148           | Arg106  |
| Q110            | Leu160   |                 |          | Tyr314             | Ala171   | Ser149           | His109  |
| Glu111          | Leu161   |                 |          | Tyr315             | Phe172   | N184             | Asp111  |
| Thr112          | Lys164   |                 |          | Ser316             | Ala174   | His216           |         |
| Leu113          | Ile165   |                 |          |                    | Val175   | Lys217           |         |
| Cys115          | Arg167   |                 |          |                    | Ala177   | Leu218           |         |
| Gly116          | Ser168   |                 |          |                    | Arg178   | Lys219           |         |
| Lys117          |          |                 |          |                    | Val179   |                  |         |
| Asp118          |          |                 |          |                    | Ala181   |                  |         |
|                 |          |                 |          |                    | His182   |                  |         |
|                 |          |                 |          |                    | Ala185   |                  |         |
|                 |          |                 |          |                    | Thr186   |                  |         |

Hydrogen-bonds in the IL-23:IL-23R:Nb22E11 structure listed per interface as determined by Chimera

| IL-23R: IL-23p19 |   |          | IL-23R: IL-12p40 |   |          | IL-12p40: IL-23p19 |   |          | IL-12B:Nb22E11 |   |         |
|------------------|---|----------|------------------|---|----------|--------------------|---|----------|----------------|---|---------|
| IL-23R           |   | IL-23p19 | IL23R            |   | IL-12p40 | IL-12p40           |   | IL-23p19 | IL-12p40       |   | Nb22E11 |
| Gly24            | - | Lys164   | Arg62            | - | Asp109   | Glu203             | - | His70    | Asp40          | - | Lys65   |
| N27              | - | Lys164   | Arg62            | - | Asp109   | Glu203             | - | Ile71    | Asp63          | - | Arg106  |
| N29              | - | Glu58    |                  |   |          | Glu203             | - | Ile71    | Phe82          | - | Pro103  |
| Glu111           | - | Arg57    |                  |   |          | Ser267             | - | His182   | Gly83          | - | Arg106  |
| Thr112           | - | Arg57    |                  |   |          | Tyr268             | - | Cys77    | Gly83          | - | Arg106  |
| Leu113           | - | Arg57    |                  |   |          | Asp292             | - | Q38      | Ala85          | - | Arg106  |
| Asp118           | - | W156     |                  |   |          | Asp312             | - | Arg178   | Glu108         | - | Arg52   |
|                  |   |          |                  |   |          | Asp312             | - | Arg178   | Glu108         | - | Arg52   |
|                  |   |          |                  |   |          |                    |   |          | Glu108         | - | Arg52   |
|                  |   |          |                  |   |          |                    |   |          | N184           | - | Thr28   |

Buried residues in the IL-23:Briakinumab<sup>Fab</sup> structure listed per interface (only between p40 and Fab and observed at least twice) as determined by PISA

| IL-12p40:Heavy |        |
|----------------|--------|
| IL-12p40       | Heavy  |
| Asp36          | Q1     |
| W37            | Val2   |
| Tyr38          | Gly26  |
| Pro39          | Phe27  |
| Asp40          | Thr28  |
| Ala41          | Ser31  |
| Lys80          | Tyr32  |
| Glu81          | Gly33  |
| Phe82          | Arg52  |
| Lys106         | Tyr53  |
| Lys107         | Ser56  |
| Glu108         | N57    |
| Asp109         | Tyr59  |
| Gly110         | Thr98  |
| Ile111         | His99  |
| Ser113         | Gly100 |
| Thr114         | Ser101 |
| Asp115         | His102 |
| Leu117         | Asp103 |
| Lys118         | N104   |
| Asp119         |        |
| Lys121         |        |
| Thr147         |        |
| Ile148         |        |
| Lys219         |        |

| IL-12p40:Light |        |
|----------------|--------|
| IL-12p40       | Light  |
| Asp36          | N32    |
| Tyr38          | Thr33  |
| Lys107         | Lys35  |
| Asp109         | Tyr50  |
| Gly110         | Tyr51  |
| Ile111         | Q90    |
| W112           | Tyr92  |
| Ser113         | Arg94  |
| Thr114         | Tyr95  |
| Lys124         | Thr96  |
| N125           | His97  |
| Lys126         | Pro98  |
|                | Leu100 |

Hydrogen-bonds in the IL-23:Briakinumab<sup>Fab</sup> structure listed per interface (only between IL-23 and Fab and observed at least twice) as determined by Chimera

| IL-12p40:Heavy |   |        |
|----------------|---|--------|
| IL-12p40       |   | Heavy  |
| Asp36          | - | Ser101 |
| W37            | - | Ser31  |
| Asp109         | - | Gly100 |
| Lys219         | - | Tyr53  |

| IL-12p40:Light |   |       |
|----------------|---|-------|
| IL-12p40       |   | Light |
| Asp36          | - | Tyr51 |
| Asp109         | - | Lys35 |

**Table S2 (Related to Figure1). Mapping of missense SNP onto the IL-23:IL-23R structure.**

SS=Signal sequence; CP=Cytoplasm; TM=transmembrane domain; EC=Extracellular; D1=Domain 1; D2=Domain 2; D3=Domain 3.

**Most common missense mutations in hIL-23R according to the Exome Aggregation Consortium (ExAC) browser (<http://exac.broadinstitute.org>).** Highlighted residues are present in the IL-23:IL-23R:Nb22E11 structure reported herein.

| Mutation | Rs number | Location | References/pathophysiology                                                                                                                                                                                                                                                                                                                                                                                                                                                                                                                                                       |
|----------|-----------|----------|----------------------------------------------------------------------------------------------------------------------------------------------------------------------------------------------------------------------------------------------------------------------------------------------------------------------------------------------------------------------------------------------------------------------------------------------------------------------------------------------------------------------------------------------------------------------------------|
| L310P    | 7530511   | D3       | Duer et al. 2006 →GWAS →no effect on IBD<br>Cargill et al. 2007 → SNP meta analysis → protective against psoriasis<br>Huber et al. 2008 → targeted genotyping →susceptibility to Graves' Ophthalmopathy                                                                                                                                                                                                                                                                                                                                                                          |
| Q3H      | 1884444   | SS       | Duer et al. 2006 →GWAS →not linked to IBD<br>Cargill et al. 2007 → SNP meta analysis → not linked to psoriasis                                                                                                                                                                                                                                                                                                                                                                                                                                                                   |
| R381Q    | 11209026  | CP       | Li et al. 2016 → targeted sequencing → susceptibility to MS<br>Duer et al.2006 →GWAS →protection against IBD<br>Cargill et al. 2007 → SNP meta analysis → protective against psoriasis<br>Huber et al. 2008 → targeted genotyping →not linked to Graves' Ophthalmopathy<br>Silverberg et al. 2009 → GWAS →protection against UC<br>Pidashveva et al. 2011 → reduced surface expression and activation<br>Momozawa et al. 2011 → targeted sequencing →protective against IBD<br>Raymond et al. 2014 → soluble IL23R isoform<br>Sivanessan et al. 2016 →reduced surface expression |
| V362I    | 41313262  | TM       | Peng et al. 2017→ GWAS meta analysis → protective against UC<br>Rivas et al. 2011 → targeted sequencing → protective against IBD<br>Momozawa et al. 2011 → targeted sequencing → protective against IBD<br>Sivanessan et al. 2016→reduced surface expression →protective                                                                                                                                                                                                                                                                                                         |
| G149R    | 76418789  | D2       | Rivas et al. 2011 → targeted sequencing → protective against IBD<br>Momozawa et al. 2011 → targeted sequencing →protective against IBD<br>Onodera et al. 2015 →targeted sequencing → protective against CD<br>Sivanessan et al. 2016→ reduced surface expression                                                                                                                                                                                                                                                                                                                 |
| R86Q     | 76575803  | D1       | Momozawa et al. 2011 → targeted sequencing →protective against IBD                                                                                                                                                                                                                                                                                                                                                                                                                                                                                                               |
| A199V    | 143130647 | D2       |                                                                                                                                                                                                                                                                                                                                                                                                                                                                                                                                                                                  |
| L193F    | 146440064 | D2       |                                                                                                                                                                                                                                                                                                                                                                                                                                                                                                                                                                                  |
| S559R    |           | CP       |                                                                                                                                                                                                                                                                                                                                                                                                                                                                                                                                                                                  |
| P306S    | 147093105 | D3       |                                                                                                                                                                                                                                                                                                                                                                                                                                                                                                                                                                                  |
| V160A    |           | D2       |                                                                                                                                                                                                                                                                                                                                                                                                                                                                                                                                                                                  |
| S221F    |           | D3       |                                                                                                                                                                                                                                                                                                                                                                                                                                                                                                                                                                                  |
| L372F    |           | TM       |                                                                                                                                                                                                                                                                                                                                                                                                                                                                                                                                                                                  |
| I373G    |           | TM       |                                                                                                                                                                                                                                                                                                                                                                                                                                                                                                                                                                                  |
| V159M    |           | D2       |                                                                                                                                                                                                                                                                                                                                                                                                                                                                                                                                                                                  |
| I341M    |           | EC       |                                                                                                                                                                                                                                                                                                                                                                                                                                                                                                                                                                                  |
| I354T    |           | EC       |                                                                                                                                                                                                                                                                                                                                                                                                                                                                                                                                                                                  |
| D129E    |           | D2       |                                                                                                                                                                                                                                                                                                                                                                                                                                                                                                                                                                                  |

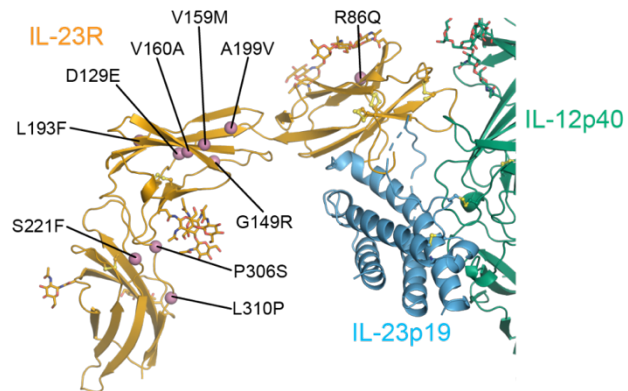

**Most common missense mutations in human IL-12p40 according to the ExAC browser.**

| Mutation | Rs number | Location | References/pathophysiology                                                                                                                                                                                   |
|----------|-----------|----------|--------------------------------------------------------------------------------------------------------------------------------------------------------------------------------------------------------------|
| V298F    | 3213119   | D3       | Cargill et al. 2007 → no significant genetic association with psoriasis<br>Prescott et al. 2015 → targeted sequencing → protective for IBD<br>Fang et al. 2015 → SNP meta analysis → melanoma susceptibility |
| V33I     | 3213096   | D1       | Cargill et al. 2007 → no significant genetic association with psoriasis<br>Fang et al. 2015 → SNP meta analysis → no effect on melanoma susceptibility                                                       |
| S226N    | 55661460  | D2       |                                                                                                                                                                                                              |
| R288T    | 370904274 | D3       |                                                                                                                                                                                                              |
| R250Q    | 74644143  | D3       |                                                                                                                                                                                                              |
| G182R    | 10045130  | D2       |                                                                                                                                                                                                              |
| E95K     | 562877471 | D1       |                                                                                                                                                                                                              |
| T169M    |           | D2       |                                                                                                                                                                                                              |
| V275I    | 189324104 | D3       |                                                                                                                                                                                                              |
| T291M    |           | D3       |                                                                                                                                                                                                              |
| R179T    | 375159171 | D2       |                                                                                                                                                                                                              |
| S100L    | 144694601 | D1       |                                                                                                                                                                                                              |
| E321K    |           | D3       |                                                                                                                                                                                                              |
| V325M    | 56064925  | D3       |                                                                                                                                                                                                              |
| L101F    |           | D1       |                                                                                                                                                                                                              |
| V96F     |           | D1       |                                                                                                                                                                                                              |
| E81G     |           | D1       |                                                                                                                                                                                                              |
| G171R    | 189313574 | D2       |                                                                                                                                                                                                              |

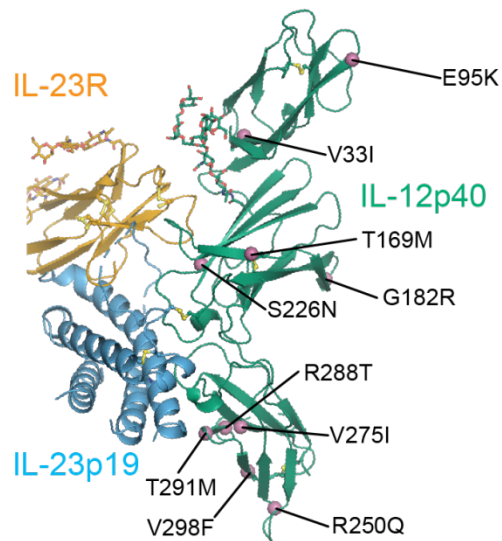

**Most common missense mutations in human IL-23p19 according to the ExAC browser.**

| Mutation | Rs number | Location | References/pathophysiology |
|----------|-----------|----------|----------------------------|
| P14L     | 145233794 | SS       |                            |
| R178Q    |           | αD       |                            |
| M8I      |           | SS       |                            |
| L2P      |           | SS       |                            |
| S106L    |           | αB       |                            |
| P117L    |           | BC loop  |                            |
| A177T    |           | αD       |                            |
| R158C    |           | αD       |                            |
| P14T     |           | SS       |                            |
| R158H    | 146998334 | αD       |                            |
| P113A    |           | BC loop  |                            |
| P113L    |           | BC loop  |                            |
| T144S    |           | CD loop  |                            |
| K164R    |           | αD       |                            |
| E58Q     |           | AB loop  |                            |

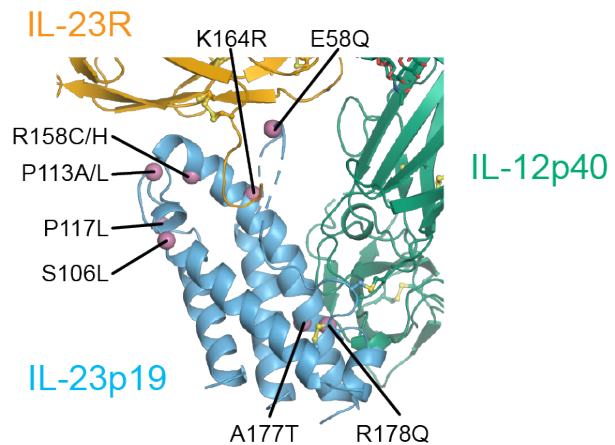

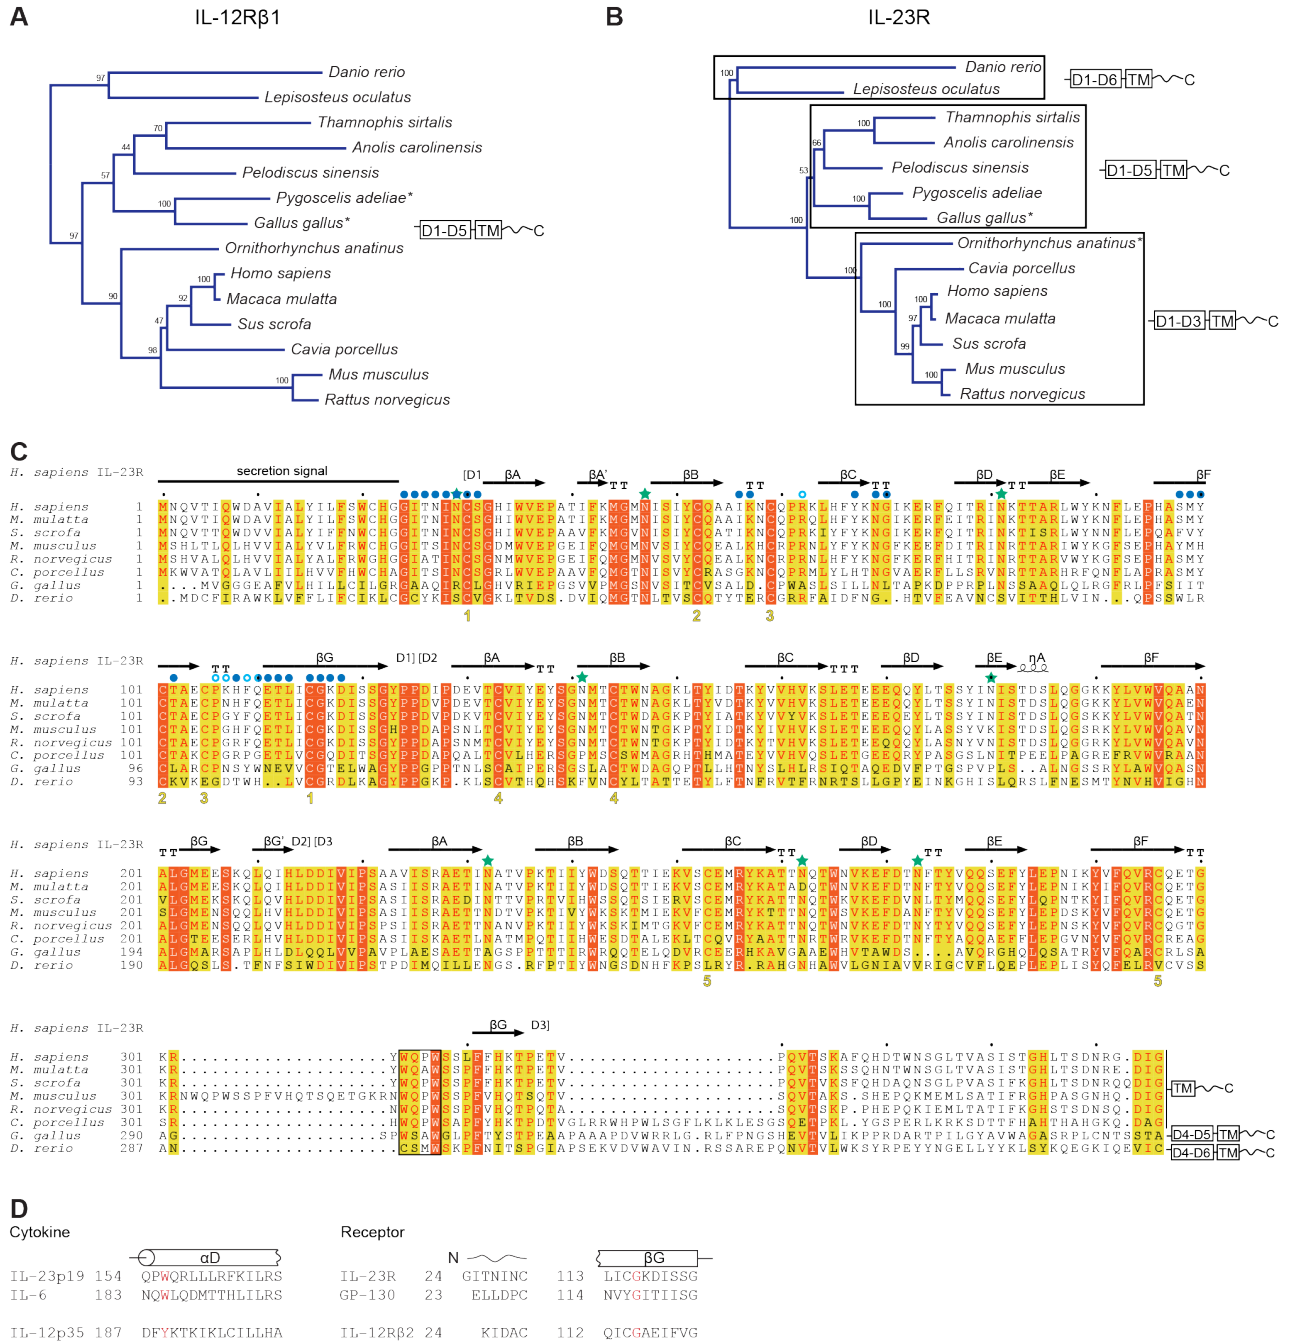

**Figure S1 (Related to Figure 1). Phylogenetic analysis of IL-23R and sequence alignments.**

Phylogenetic analysis of IL-12Rβ1 (A) and IL-23R (B). The mammalian IL-23R orthologues cluster distinctly from those in lower-jawed vertebrates, which have additional FnIII domains. Asterisks indicate sequences manually assembled from available genomic data. Multiple sequence alignments were performed with MAFFT 7 using the E-INS-I algorithm for refinement. The phylogenetic analysis was performed on the <http://mafft.cbrc.jp/alignment/> server. (C) Structurally annotated multiple sequence alignments of the extracellular domains of IL-23R using the ESPripT server (<http://escript.ibcp.fr/ESPripT/ESPripT/>). Stars indicate N-linked glycosylation sites, full blue spheres residues interacting with IL-23p19, and hollow blue spheres residues interacting with IL12p40. The characteristic WSXW motif in the CHR region is indicated by a black box. (D) Structure-based sequence alignment of cytokine and receptor regions in IL-23:IL-23R and IL-6:gp130 complexes, IL-12p35, and IL-12Rβ2.

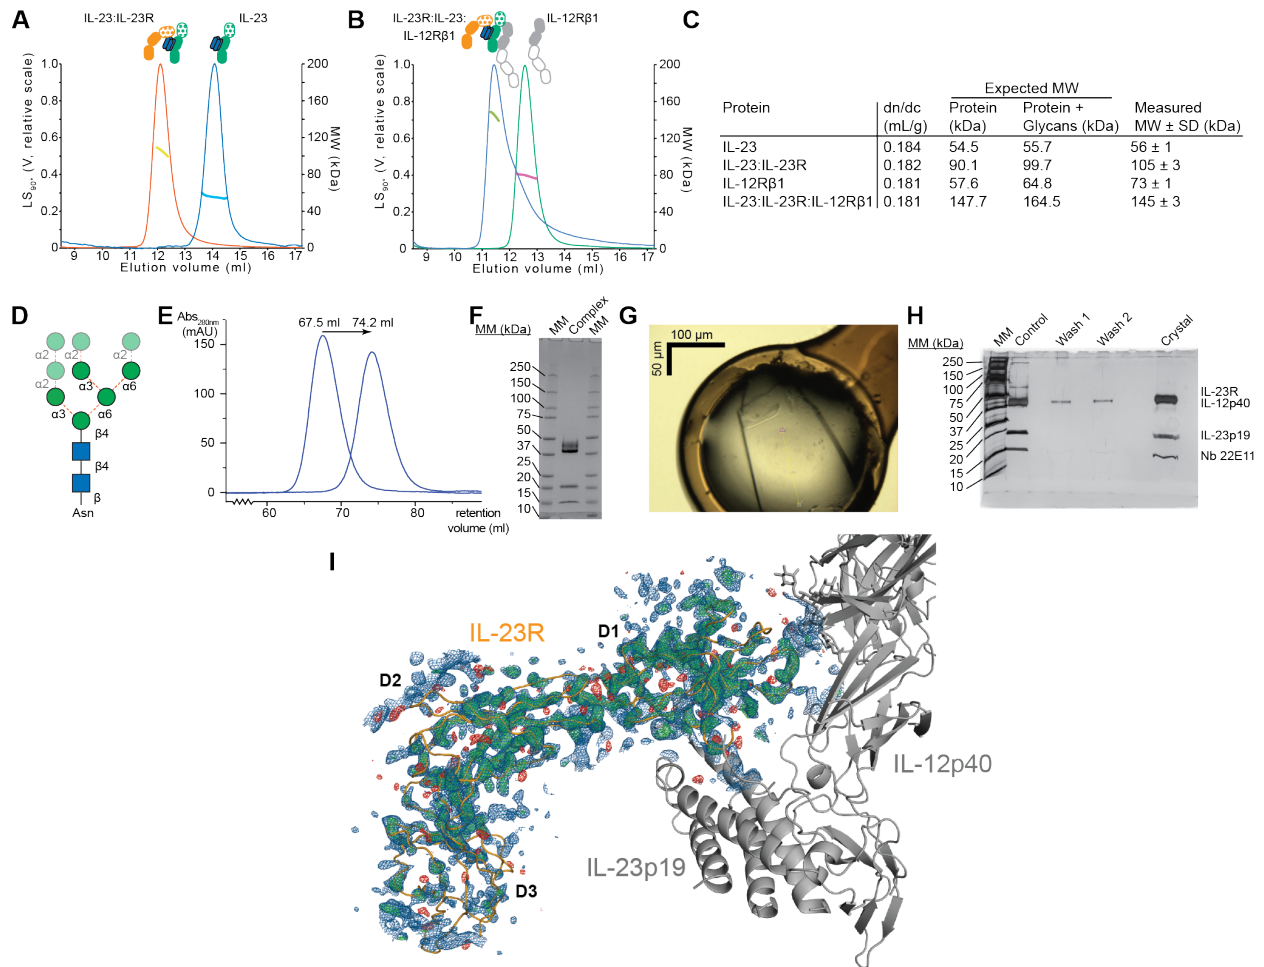

**Figure S2 (Related to Figure 1). Assembly and characterization of the IL-23:IL23R complex.**

(A) Characterization of the IL-23 complex by SEC-MALLS. Elution profile recorded by the right-angle laser light scattering detector (left axis) plotted against determined molecular weight (right axis). IL-23 forms a binary complex with IL-23R. (B) The preformed IL-23:IL-23R can be further complemented with IL-12Rβ1 leading to a ternary complex. Molecular weights determined by MALLS are summarized in panel (C) Data are presented as average molecular weights ± standard deviations calculated in Excel over the selected region of the peaks. (D) Schematic representation of the N-linked glycans present in the IL-23:IL23R:Nb22E11 structure (Mannoses in green and GlcNAc in blue). Dashed orange lines represent bonds that could be hydrolyzed by Jack bean α-mannosidase. The α1-2 linked mannoses present at the non-reducing end of the oligosaccharide are normally removed by mannosidases in the Golgi during oligosaccharide maturation leading to a Man5GlcNAc2 oligosaccharides normally expected in HEK293S *MGAT1*<sup>-/-</sup> cells. (E) Trimming of the N-linked glycans on the IL-23:IL23R:Nb22E11 complex by Jack bean α-mannosidase leads to a clear increase in retention volume on a SD200 16/600 column. (F) Coomassie-stained SDS-PAGE analysis under reducing conditions of the IL-23:IL23R:Nb22E11 complex used for protein crystallization. IL-23R migrates as a fuzzy band just above IL-12p40 around 40 kDa. (G) Crystal of the IL-23:IL23R:Nb22E11 complex as mounted in a Dual thickness Microloop (MiTeGen, Ithaca, USA) for data collection at Petra III beamline P14 (EMBL-Hamburg, Germany) (H) Silver-stained reduced SDS-PAGE analysis of IL-23:IL23R:Nb22E11 crystals to characterize the molecular contents of the crystal. Starting from a crystallization drop, crystals were washed by serially transferring them to drops containing mother liquor (3 times). The first two wash drops were loaded in lanes Wash1 and Wash2. The final drop containing the crystals was loaded in the lane labelled Crystal. A crystallization droplet of the same protein complex that did not yield any crystals was loaded in the Control lane. IL-23R and IL-12p40 have similar electrophoretic patterns. Contaminants present in the original sample running around 65 kDa and 200 kDa are not present in the crystals. (I) Phasing of the IL-23:IL23R:Nb22E11 crystals by molecular replacement in Phaser using IL-23 and Nb22E11 as search models resulted in clearly interpretable difference density for IL-23R. Shown are mFo-DFc difference electron density maps calculated at +3 r.m.s.d. (green map) and -3 r.m.s.d. (red map), 2mFo-DFc map (blue map) calculated at +1.5 r.m.s.d.

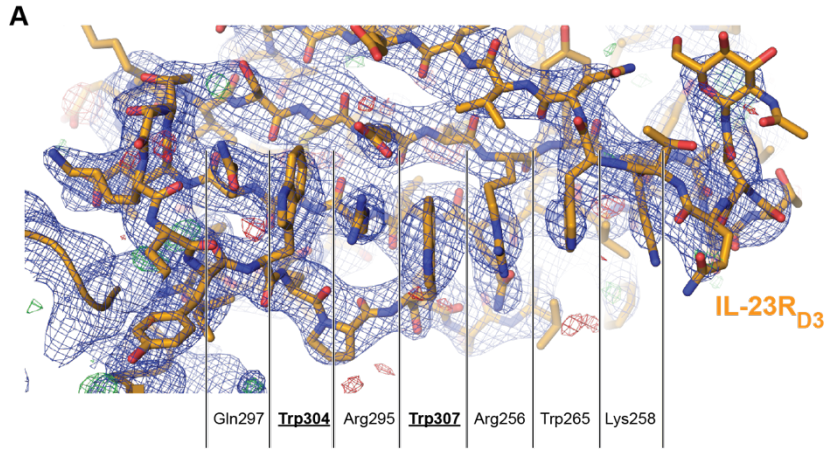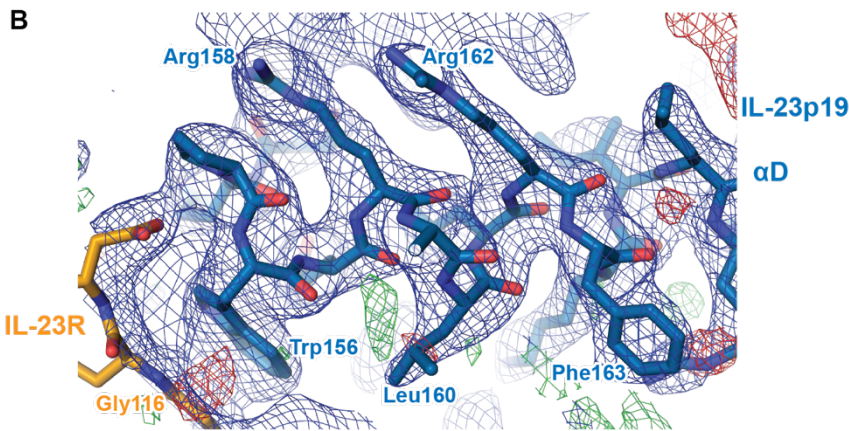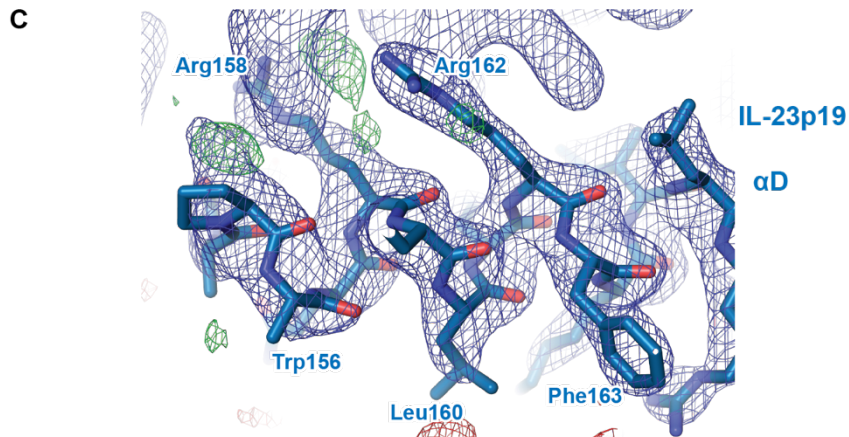

**Figure S3 (Related to Results, Crystal structure of the human IL-23:IL-23R complex, Figure 1). Close-up views of regions of special interest in the IL-23:IL-23R complex**

Electron density maps carved 5Å around the region of interest in Pymol. mFo-DFc map calculated at +3 r.m.s.d. (green map) and -3 r.m.s.d. (red map), 2mFo-DFc map (blue map) calculated at +1.5 r.m.s.d. The WSXWS motif on IL-23R domain 3 is part of an elaborate sidechain stacking arrangement running all along the side of the domain (**A**). The W residues part of the WSXWS motif are underlined and shown in bold. Electron density maps carved around the N-terminal part of IL-23p19 helix D in the IL-23:IL-23R:Nb22E11 (**B**) and unbound IL-23 (**C**) structures. The quality of the electron density around W156 is of remarkably better quality in the bound versus the unbound structure. There is no interpretable electron density present at the N-terminal part of helix D in support of a specific W156 sidechain rotamer. Which is indicative of inherent flexibility in this region.

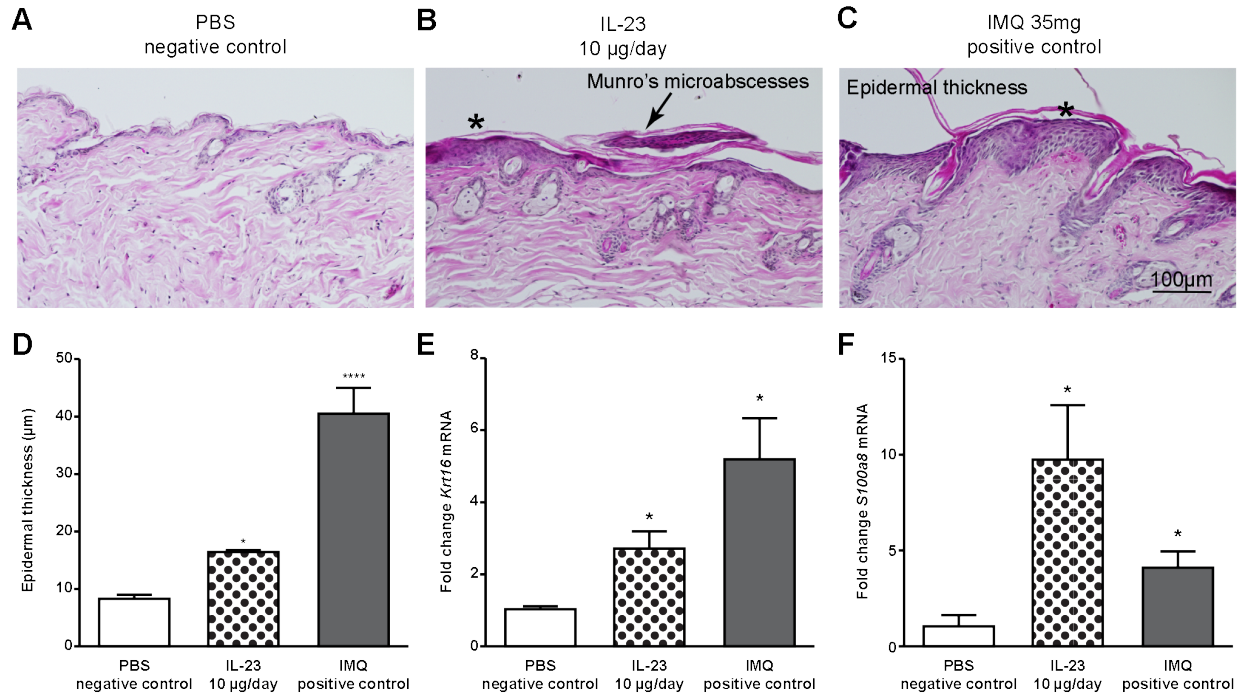

**Figure S4 (Related to Figure 3). IL-23 dose validation and comparison with IMQ in induction of epidermal hyperplasia and markers of epidermal hyperplasia.**

**A-C.** Representative H&E staining of cutaneous biopsies showing diffuse epidermal hyperplasia (acanthosis) (asterisk) with associated compact hyperkeratotic and parakeratosis of the stratum corneum and the formation of Munro's microabscesses (arrow), (scale bar 100 µm). **D.** Quantification of epidermal thickness by microscopy in the indicated mice treatments. Fold change in mRNA expression levels of *Krt16* (**E**) and *S100a8* (**F**) in IMQ and IL-23 WT treated skin compared with PBS injected skin assessed by qPCR at day 4. Data are presented as  $\pm$  s.e.m, and p-values were determined using one-way ANOVA followed by Holm-Sidak's multiple comparisons test (\* $p < 0.05$ ; \*\* $p < 0.01$ ; \*\*\* $p < 0.001$ ; \*\*\*\* $p < 0.0001$ ). ( $n = 4$  for each group).



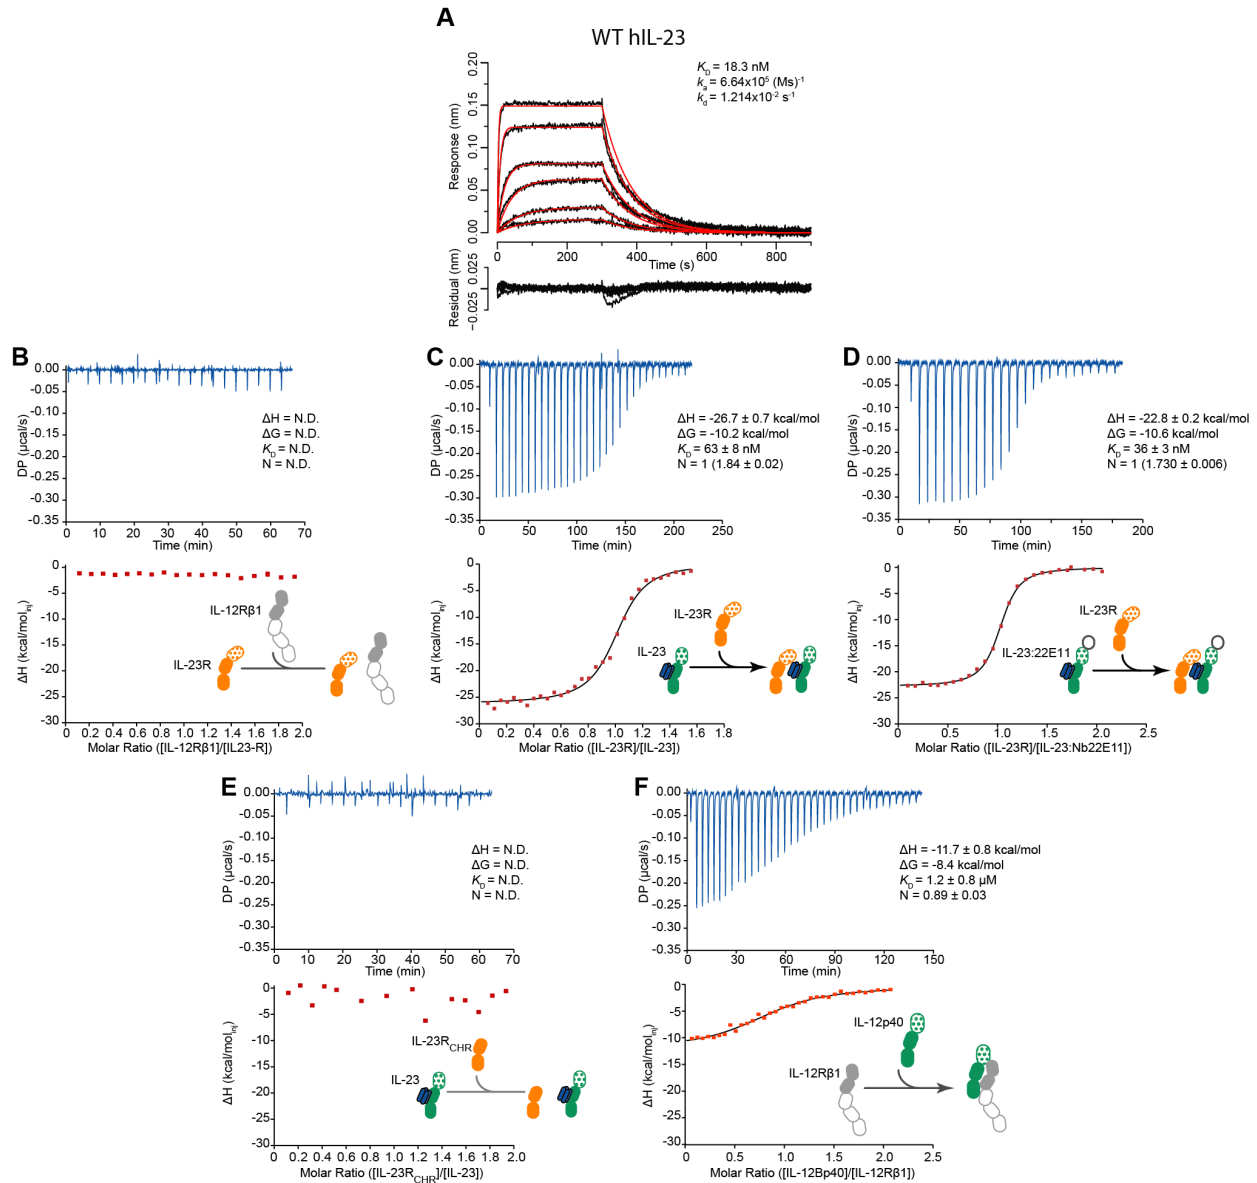

**Figure S5 (Related to Figure 1, Figure 3 and Figure 4). Kinetic and thermodynamic characterization of interactions between various constructs/modules of IL-23, IL-23R, and IL-12Rβ1.**

A) Representative BLI sensorgrams (black), fitted 1:1 model (red) and residual (black, bottom graph) used to characterize the binding kinetics ( $k_a$ ,  $k_d$ ) and affinity ( $K_D$ ) of human IL-23 towards mouse IL-23R. Anti-human IgG Fc capture biosensors were coated with mIL-23R\_Fc and dipped into a threefold dilution series of human cytokine (517 nM, 172 nM, 57 nM, 19 nM, 6 nM and 2 nM). (C, D, F) Representative ITC experiments performed on a VP-ITC machine or a PEAQ-ITC instrument (B, E). B) Titration of 102  $\mu$ M IL-12R $\beta$ 1 in 10.2  $\mu$ M IL-23R at 309.95 K. C) Titration of 70.2  $\mu$ M IL-23R in 4.97  $\mu$ M IL-23 at 310.15 K. D) Titration of 70.2  $\mu$ M IL-23R in 4.0  $\mu$ M IL-23 at 310.15 K. E) Titration of 60.0  $\mu$ M IL-23R<sub>CHR</sub> in 6  $\mu$ M IL-23 at 310.05 K. F) Titration of 93.2  $\mu$ M IL-12Bp40 in 8.8  $\mu$ M IL-12R $\beta$ 1 at 310.15 K. The stoichiometry of experiments C and D were set to 1 and the concentration in the syringe was allowed to be fitted to account for binding incompetent IL-23. The stoichiometry of the experiment before correction is reported between parenthesis. Fitted values are reported with their fitting errors as reported by the MicroCal PEAQ-ITC Analysis software version 1.1.0.1262.

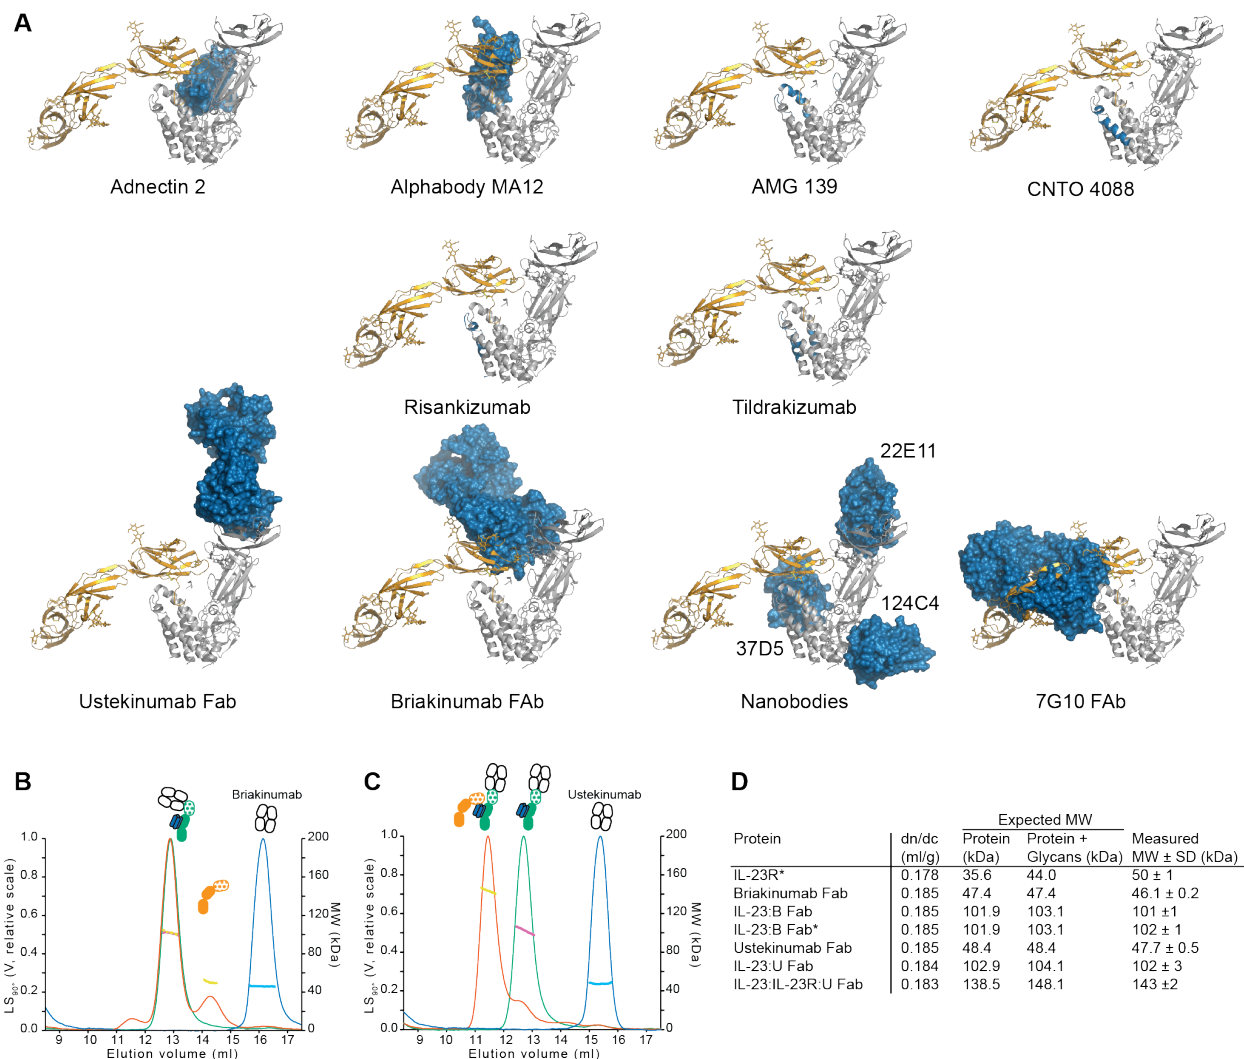

**Figure S6 (Related to Figure 5 and Figure 6). Overview and structural mapping of IL-23 antagonists, and characterization by SEC-MALLS of IL-23:antibody complexes.**

(A) Several IL-23 antagonists have been described in peer-reviewed literature as well as in patent literature. The structure of IL-23:IL-23R (in grey and orange respectively) is combined into a hybrid model with the structures of the IL-23 bound (IL-12 in case of ustekinumab) antagonist (in blue surface representation) when publically available. When no structure was publicly available the epitope described in the patents was mapped on the IL-23 structure and colored blue. The binding of most antagonists to IL-23 is incompatible with the binding of IL-23R. (B,C) Characterization of the binding of antibody Fabs to the preformed IL-23:IL23R complex in solution by SEC-MALLS. Elution profile recorded by the right-angle laser light scattering detector (left axis) plotted against determined molecular weight (right axis). Blue trace = Fab alone, green trace = IL-23:Fab complex, vermillion trace IL-23:IL-23R complex after addition of Fab (B) Briakinumab Fab competes with IL-23R for IL-23 leading to IL-23:Fab and unbound IL-23R (vermillion trace). (C) Ustekinumab Fab binds distally of the IL-23:IL-23R interaction site thereby forming a ternary IL-23:IL23R:Fab complex. Molecular weights determined by MALLS are summarized in panel (D) Values with an asterisk are calculated from the experiment where briakinumab Fab was added to the IL-23:IL-23R complex. Data are presented as average molecular weights  $\pm$  standard deviations calculated in Microsoft Excel over the selected region of the peaks.
